# Supplementary material for: The State of the Art in Transcriptomics and Proteomics of Clinically Relevant Sporothrix Species
Source: MDPI journal article supplement (doi:10.3390/jof9080790), 2023-07-27
Supplement: s1 [file s1]

Table S1. Proteins analyzed/found and objectives of the articles on the proteomics of *Sporothrix* spp.

| Ref. | Proteins found/analyzed                                                                                                                                                                                                                                                                                                                                               | Main objective                                                                                                                               |
|------|-----------------------------------------------------------------------------------------------------------------------------------------------------------------------------------------------------------------------------------------------------------------------------------------------------------------------------------------------------------------------|----------------------------------------------------------------------------------------------------------------------------------------------|
| [53] | Gp70                                                                                                                                                                                                                                                                                                                                                                  | Evaluation of the effect of passive immunization of mice infected with <i>S. schenckii</i> yeast cells                                       |
| [54] | Gp70                                                                                                                                                                                                                                                                                                                                                                  | Virulence and expression of Gp70 in <i>S. brasiliensis</i> clinical isolates and <i>S. schenckii</i> strains                                 |
| [55] | Gp70                                                                                                                                                                                                                                                                                                                                                                  | Evaluation of antigenic profiles of <i>Sporothrix</i> species during human sporotrichosis                                                    |
| [56] | --                                                                                                                                                                                                                                                                                                                                                                    | Protein extraction protocol for rapid and large-scale proteomic analysis                                                                     |
| [58] | 3-carboxymuconate cyclase protein                                                                                                                                                                                                                                                                                                                                     | Diversity of molecules expressed by <i>S. brasiliensis</i> and <i>S. schenckii</i> and which are recognized by IgG in serum                  |
| [59] | --                                                                                                                                                                                                                                                                                                                                                                    | Development and optimization of a new proteomic analysis protocol by MALDI-TOF/ MS for the identification of <i>Sporothrix</i> spp.          |
| [60] | --                                                                                                                                                                                                                                                                                                                                                                    | Reliability of fungal identification at the species level, by MALDI-TOF/MS technique                                                         |
| [61] | Histidine protein kinase (HPK) DRK1 and phosphatidylinositol 3-kinase (PI 3-kinase)                                                                                                                                                                                                                                                                                   | Understanding of molecular mechanisms of mycelium-yeast transition in <i>S. schenckii</i>                                                    |
| [62] | Extracellular cell wall glucanase, aminopeptidase I, Mn superoxide dismutase, heat shock 70-kDa protein 1/8, glyceraldehyde-3-phosphate dehydrogenase (GAPDH), hydroxymethylglutaryl-coenzyme A (HMG-CoA) lyase, progesterone binding protein, rhamnolipid biosynthesis 3-oxoacyl-(acyl-carrier-protein) reductase, and acetyl-CoA hydrolase                          | Comparison of genomes and proteomes expressed in <i>S. brasiliensis</i> and <i>S. schenckii</i> yeast cells                                  |
| [63] | ZR3 (importin), ZR4 (hypothetical protein) and ZR8 (GP70)                                                                                                                                                                                                                                                                                                             | Evaluation of antigenic proteins from a <i>S. brasiliensis</i> strain for the development of an effective vaccine                            |
| [64] | Serine/threonine protein kinases                                                                                                                                                                                                                                                                                                                                      | Analysis of part of the composition of EVs from <i>S. brasiliensis</i> yeast cells                                                           |
| [65] | 70 kDa heat shock protein (Hsp70), GroEL chaperonin, elongation factor 1- (EF-1), mitochondrial peroxiredoxin (Prx1) and a hypothetical protein                                                                                                                                                                                                                       | Identification of proteins potentially involved and differentially expressed in the response to oxidative stress involving hydrogen peroxide |
| [66] | Thioredoxin1 (Trx1), superoxide dismutase (Sod), GPI-anchored cell wall protein, $\beta$ -1,3-endoglucanase EglC, glycoside hydrolase (Gh), chitinase, CFEM domain protein, glycosidase crf1, covalently-linked cell wall protein (Ccw), 30 kDa heat shock protein (Hsp30), lipase, trehalase (Treh), fructose-bisphosphate aldolase (Fba1) and citrate synthase (Cs) | Proteomic analysis of the cell wall of <i>S. schenckii</i> in response to the oxidative agent menadione                                      |
|      | Peroxiredoxin (Prx), Superoxide dismutase (Sod) (Cu-Zn),                                                                                                                                                                                                                                                                                                              |                                                                                                                                              |

|      |                                                                                                                                                                                                                                                                                                                                                                                                                                                                                                                                                                                                                                                                                                                                                                                                                                                                                                                                                                                                                                                                                                                                                                                                                                                                                                                                                                                                                                                                                                                                                                                                                                                                                                                                                                       |                                                                                                                                                                       |
|------|-----------------------------------------------------------------------------------------------------------------------------------------------------------------------------------------------------------------------------------------------------------------------------------------------------------------------------------------------------------------------------------------------------------------------------------------------------------------------------------------------------------------------------------------------------------------------------------------------------------------------------------------------------------------------------------------------------------------------------------------------------------------------------------------------------------------------------------------------------------------------------------------------------------------------------------------------------------------------------------------------------------------------------------------------------------------------------------------------------------------------------------------------------------------------------------------------------------------------------------------------------------------------------------------------------------------------------------------------------------------------------------------------------------------------------------------------------------------------------------------------------------------------------------------------------------------------------------------------------------------------------------------------------------------------------------------------------------------------------------------------------------------------|-----------------------------------------------------------------------------------------------------------------------------------------------------------------------|
| [67] | <p>GPI-anchored cell wall <math>\beta</math>-1,3- endoglucanase EglC <math>\beta</math>-glucosidase, Covalently-linked cell wall protein, <math>\beta</math>-1,3-glucanosyltransferase, Trehalose synthase (TreS), Heat shock protein 70-5 (Hsp70-5), Glycoside hydrolase, GPI anchored cell wall protein, Lipase 1 (Lip1), Glycosidase crf1, Elongation factor 1-beta (EF-1<math>\beta</math>), Trehalose-6-phosphate synthase (Tps1), Citrate synthase (Cs), Glyceraldehyde-3-phosphate dehydrogenase (Gapdh), Enolase (Eno), Elongation factor 1-alpha (EF-1<math>\alpha</math>), Phosphoglycerate kinase (PgK), Triosephosphate isomerase (Tpi), Fructose-bisphosphate aldolase (Fba), Pyruvate kinase (Pk), Alcohol dehydrogenase (Adh), Trehalase (Trh), Thioredoxin 1 (Thx) and CFEM domain-containing protein</p>                                                                                                                                                                                                                                                                                                                                                                                                                                                                                                                                                                                                                                                                                                                                                                                                                                                                                                                                             | <p>Evaluation of which cell wall proteins of <i>S. schenckii</i> modify their expression in response to oxidative agent, hydrogen peroxide.</p>                       |
| [68] | <p>Glycolytic pathway HK (hexokinase), GPI (glucose-6-phosphate isomerase), FBA (fructose biphosphate aldolase), TPI (triosephosphate isomerase) GAPDH (glyceraldehyde 3 phosphate dehydrogenase), PGK (phosphoglycerate kinase), ENO (enolase), PK (pyruvate kinase); TCA cycle PDH (pyruvate dehydrogenase), CS (citrate synthase), ACO (aconitase), OGDHE1 (2-oxoglutarate dehydrogenase E1 component), OGDHE2 (2-oxoglutarate dehydrogenase E2 component), FH (fumarate hydratase), MDH (malate dehydrogenase); vitamin biosynthesis THI4 (thiamine biosynthetic enzyme); fermentation ADH (alcohol dehydrogenase); respiratory chain NDUFAB1 (NADH dehydrogenase ubiquinone 1 alpha beta subcomplex 1); pentose phosphate pathway PGD (6-phosphogluconate dehydrogenase), TKL (transketolase), TAL (transaldolase); amino acid metabolism BCAT (branched-chain amino acid aminotransferase), ASA (aspartatesemialdehyde dehydrogenase), ABAT (4-aminobutyrate aminotransferase), MCC (3-methylcrotonyl-CoA carboxylase beta subunit), ALT (alanine transaminase), HPPD (4-hydroxyphenylpyruvate dioxygenase), CBS (cystathionine beta synthase), CTH (cystathionine gamma lyase); cell wall remodeling GLU (Endo-1,3(4)-glucanase), BGL (beta-glucosidase), TRES (trehalose synthase), UAP (UDP-N-acetylglucosamine pyrophosphorylase); oxidative stress response SOD (superoxide dismutase), CATP (catalase/peroxidase), CAT (catalase), PRX1 (peroxiredoxin), GSR (glutathione reductase), GST (glutathione S transferase); heat shock response GroEL (chaperonin GroEL), GroES (chaperonin GroES), HSP70-4 (heat shock 70 kDa protein 4), HSP70-5 (heat shock 70 kDa protein 5), HtpG (molecular chaperone HtpG), HSP70-18 (heat shock 70 kDa protein 18)</p> | <p>Robust proteomic analysis of three human pathogenic species of the genus <i>Sporothrix</i>: <i>S. brasiliensis</i>, <i>S. schenckii</i> and <i>S. globosa</i>.</p> |
| [69] | <p>Albumin, transferrin, serum amyloid component (SAP) and <math>\alpha</math>-1 antitrypsin (AAT)</p>                                                                                                                                                                                                                                                                                                                                                                                                                                                                                                                                                                                                                                                                                                                                                                                                                                                                                                                                                                                                                                                                                                                                                                                                                                                                                                                                                                                                                                                                                                                                                                                                                                                                | <p>Identification of human serum proteins that bind to <i>S. schenckii</i> conidia and increase phagocytosis</p>                                                      |
| [70] | <p>Heat shock protein 60 (Hsp60) and Pap1</p>                                                                                                                                                                                                                                                                                                                                                                                                                                                                                                                                                                                                                                                                                                                                                                                                                                                                                                                                                                                                                                                                                                                                                                                                                                                                                                                                                                                                                                                                                                                                                                                                                                                                                                                         | <p>Evaluation of proteins that compose PRM complex cell wall and evaluate their contribution to the <i>S. schenckii</i>-host</p>                                      |

|  |  |             |
|--|--|-------------|
|  |  | interaction |
|--|--|-------------|

Table S2. Gene expression and objectives of the articles on the transcriptomics of *Sporothrix* spp.

| Ref. | Gene expression                                                                                                                                                                                                                                                                                                                                                                                                                                                                                                                         | Main objective                                                                                                                                                           |
|------|-----------------------------------------------------------------------------------------------------------------------------------------------------------------------------------------------------------------------------------------------------------------------------------------------------------------------------------------------------------------------------------------------------------------------------------------------------------------------------------------------------------------------------------------|--------------------------------------------------------------------------------------------------------------------------------------------------------------------------|
| [71] | Genes coding proteins involved in the regulation of morphogenesis and reproduction: nitrate uptake and arginine; Biosynthesis and expression of the carbamoyl phosphate synthase gene possible involved of amino acid biosynthetic pathways                                                                                                                                                                                                                                                                                             | <i>S. schenckii</i> changes in gene expression profiles associated with dimorphism through transcriptomic analyses of the mycelium and yeast phases                      |
| [73] | Expression of stress-related proteins: catalase, oxidoreductase, high osmolarity signaling protein and pH response regulatory proteins. DRK1 expression involved in regulating the mycelium-to-yeast transition; Genes coding for some proteins related to the transition: ATPase, glucanase, glucosidase, lactose regulatory protein and glucose transporter; Genes coding for proteins related to increased host adhesion and colonization: serine proteases, aspartic proteases, aspartic-type endopeptidase, and metalloproteinases | Genes involved in stress adaptation, aiming to obtain more genetic information related to the dimorphic transition in <i>S. schenckii</i>                                |
| [75] | Genes coding proteins involved in metabolic pathway processes: Transport proteins and ABC (ATP-binding cassette) transporters; Genes coding proteins involved in lipid transport and metabolism of the cell wall: glucan 1,3-beta-glucosidase, and methylsterol monooxygenase, lysine protein permease LysP, amino acid permease, MFS proteins and ABC transporters                                                                                                                                                                     | Elucidation of possible SsSte20 gene correlations with dimorphism and virulence in <i>S. schenckii</i>                                                                   |
| [76] | Genes involved in signal transduction pathways: DRK1, Hog1, Skn7 and Ste11                                                                                                                                                                                                                                                                                                                                                                                                                                                              | Transcriptomic analysis of yeast and mycelium stages in <i>S. schenckii</i> , aiming for more details about the signaling pathways that control the dimorphic transition |
